# Supplementary material
Source: publisher figshare collection journal article supplement (https://acs.figshare.com/ndownloader/files/5769144)
Supplement: Supplementary file 1 [file 5769144]

JOURNAL OF  
AGRICULTURAL AND  
FOOD CHEMISTRY

J. Agric. Food Chem., 1996, 44(5), 1285-1290, DOI: [10.1021/jf950410k](https://doi.org/10.1021/jf950410k)

**Terms & Conditions**

Electronic Supporting Information files are available without a subscription to ACS Web Editions. The American Chemical Society holds a copyright ownership interest in any copyrightable Supporting Information. Files available from the ACS website may be downloaded for personal use only. Users are not otherwise permitted to reproduce, republish, redistribute, or sell any Supporting Information from the ACS website, either in whole or in part, in either machine-readable form or any other form without permission from the American Chemical Society. For permission to reproduce, republish and redistribute this material, requesters must process their own requests via the RightsLink permission system. Information about how to use the RightsLink permission system can be found at <http://pubs.acs.org/page/copyright/permissions.html>

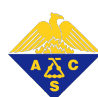

**ACS Publications**

MOST TRUSTED. MOST CITED. MOST READ.

Copyright © 1996 American Chemical Society

## Supplementary Material

Levels of lysergic acid amide (1) and ergonovine (2) as measured by HPLC in tissues of six specimens of endophyte-infected<sup>a</sup> *A. inebrians* grown in the greenhouse.

| Plant | Ergonovine (2) (mg kg <sup>-1</sup> ) |                   |        |                |      | Lysergic acid amide (1) (mg kg <sup>-1</sup> ) |      |        |       |      |
|-------|---------------------------------------|-------------------|--------|----------------|------|------------------------------------------------|------|--------|-------|------|
|       | Leaf                                  | Sen. <sup>b</sup> | Sheath | Crown          | Root | Leaf                                           | Sen. | Sheath | Crown | Root |
| 1     | 2497                                  | 661               | 881    | - <sup>c</sup> | -    | 330                                            | 90   | 86     | -     | -    |
| 2     | 1930                                  | 676               | 818    | -              | -    | 302                                            | 136  | 118    | -     | -    |
| 3     | 2565                                  | 873               | 1285   | -              | -    | 327                                            | 203  | 165    | -     | -    |
| 4     | 1863                                  | 612               | 623    | 95             | 21   | 437                                            | 165  | 127    | 35    | 9    |
| 5     | 1665                                  | 670               | 621    | -              | -    | 326                                            | 154  | 107    | -     | -    |
| 6     | 1689                                  | 510               | 566    | 67             | 14   | 418                                            | 142  | 122    | 11    | 4    |

<sup>a</sup>Neither ergonovine nor lysergic acid amide were detected in endophyte-free *A. inebrians* (limit of detection 0.5 ppm).

<sup>b</sup> senescent leaf tissue

<sup>c</sup>no analysis available.

Relative concentration of endophyte (arbitrary units), as measured by ELISA, in tissues from 4 specimens of endophyte-infected *A. inebrians* grown in the greenhouse.

| Plant | Leaf blade | Leaf Sheath | Crown | Root |
|-------|------------|-------------|-------|------|
| 1     | 33.5       | 31.5        | 24.7  | 7.3  |
| 2     | 31.8       | 29.0        | 11.9  | 4.3  |
| 3     | 25.2       | 32.3        | 18.4  | 19.0 |
| 4     | 41.0       | 49.1        | 26.4  | 2.5  |
| Mean  | 32.9       | 35.5        | 20.4  | 8.3  |
| SD    | 6.5        | 9.2         | 6.6   | 7.4  |
